# Supplementary material for: A novel Arabidopsis MYB-like transcription factor, MYBH, regulates hypocotyl elongation by enhancing auxin accumulation
Source: PubMed Central journal article supplement — J Exp Bot. 2013 Aug 14;64(12):3911–22. doi: 10.1093/jxb/ert223 (PMC3745742; doi:10.1093/jxb/ert223), 2013-08-14
Supplement: supp_ert223_jexbot099937_file001.pdf [file supp_ert223_jexbot099937_file001.pdf]

**A Novel Arabidopsis MYB-like Transcription Factor MYBH Regulates  
Hypocotyl Elongation by Enhancing Auxin Accumulation**

Yerim Kwon, Jun Hyeok Kim, Hoai Nguyen Nguyen, Yusuke Jikumaru, Yuji  
Kamiya, Suk-Whan Hong, and Hojoung Lee

# Supplementary figure S1

(A) At5g47390 (GK-783B02)

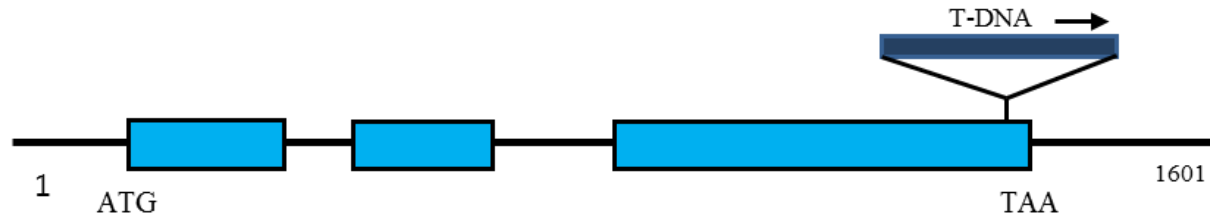

(B)

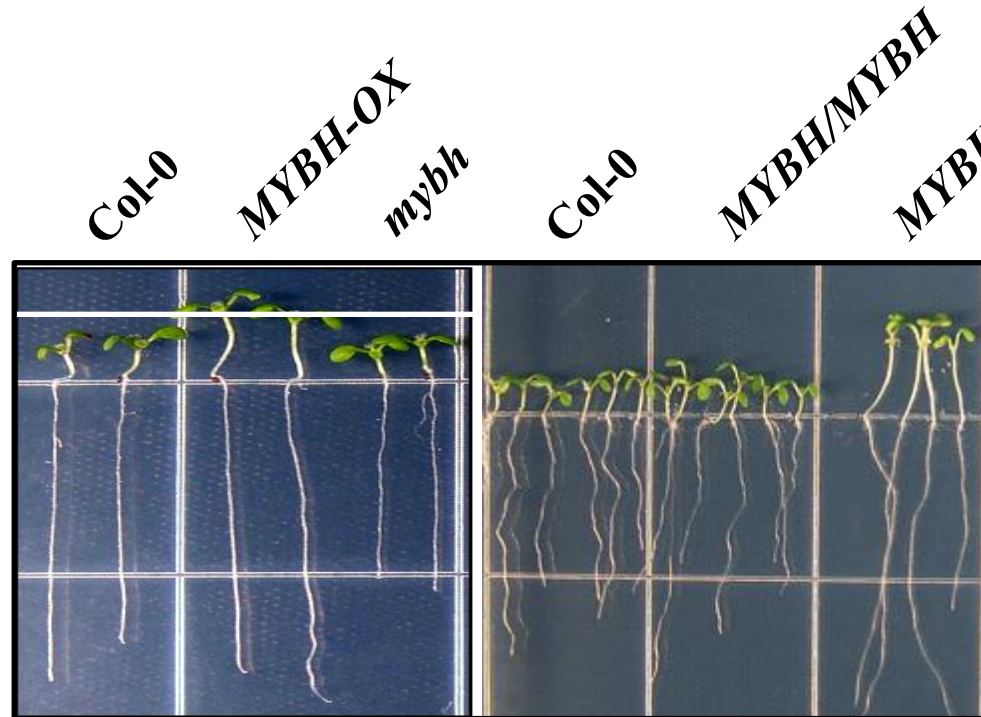

**Figure S1.** Complementation assay

Diagram of T-DNA localization in the *MYBH* gene (A) and a complementation assay in which wild-type *MYBH* was expressed under the control of the *MYBH* promoter (-1 kb) (B). The construct *MYBH**pro*::*MYBH* was transferred to *mybh* plants, and the homozygous transgenic seeds were sown on Murashige and Skoog medium for 7 d.

# Supplementary figure S2

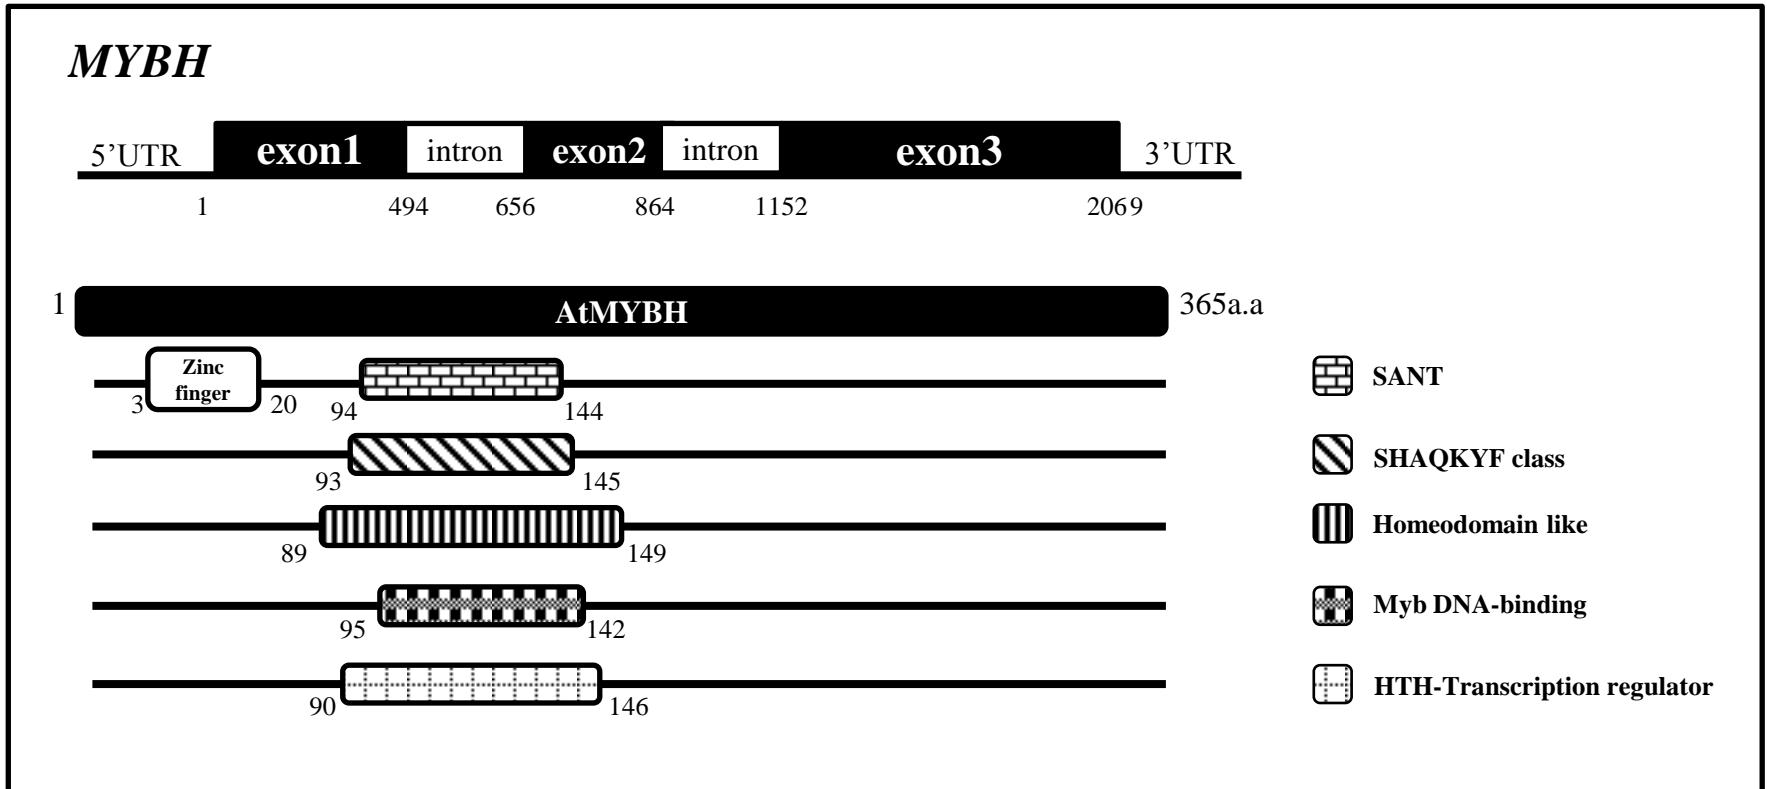

**Figure S2.** Schematic of the *MYBH* gene and protein.

*MYBH* (AT5G47390) belongs to the *MYB* family of genes that encode plant cell transcription factors consisting of three exons and two introns. *MYBH* is 2069 bp in length. The MYBH protein consists of a zinc finger, a SANT ('switching-defective protein 3 (Swi3), adaptor 2 (Ada2), nuclear receptor co-repressor (N-CoR), transcription factor (TF) IIIB'), and SHAQKYF class, homeodomain-like, MYB DNA-binding, and helix-turn-helix (HTH) transcription regulator domains.

# Supplementary figure S3

## Onion epidermis

*CaMV35S::GFP*

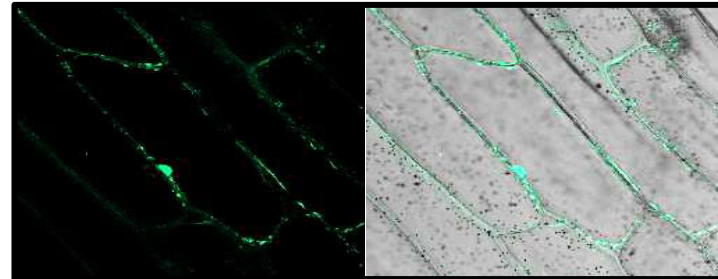

*CaMV35S::MYBH:GFP*

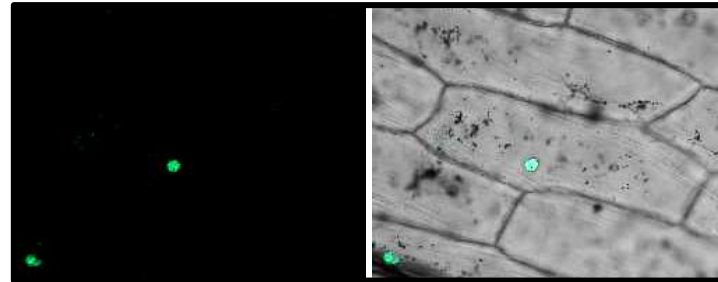

## Arabidopsis

*CaMV35S::MYBH:GFP*

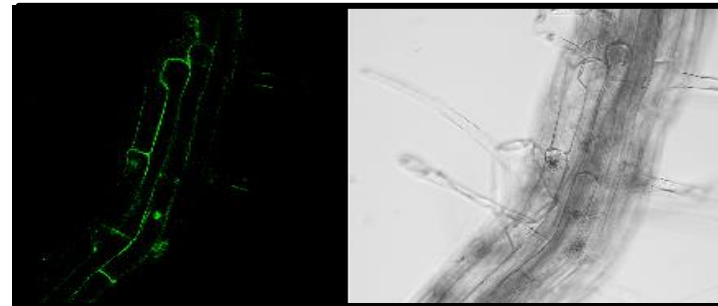

### Figure S3. Subcellular localization of MYBH

The *CaMV35S::MYBH:GFP* fusion construct was introduced into onion epidermal cells by performing particle bombardment or stably expressed in Arabidopsis. After 18–48 h of incubation, the GFP signal of the MYBH:GFP fusion protein was detected in onion cell nuclei by confocal laser scanning microscopy.

# Supplementary figure S4

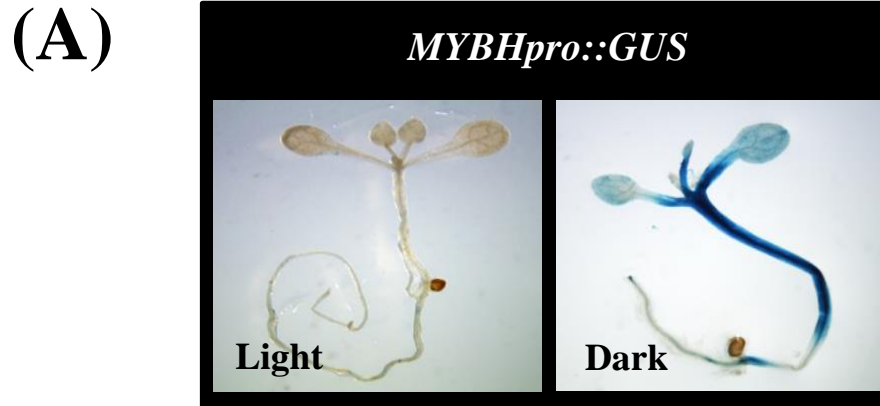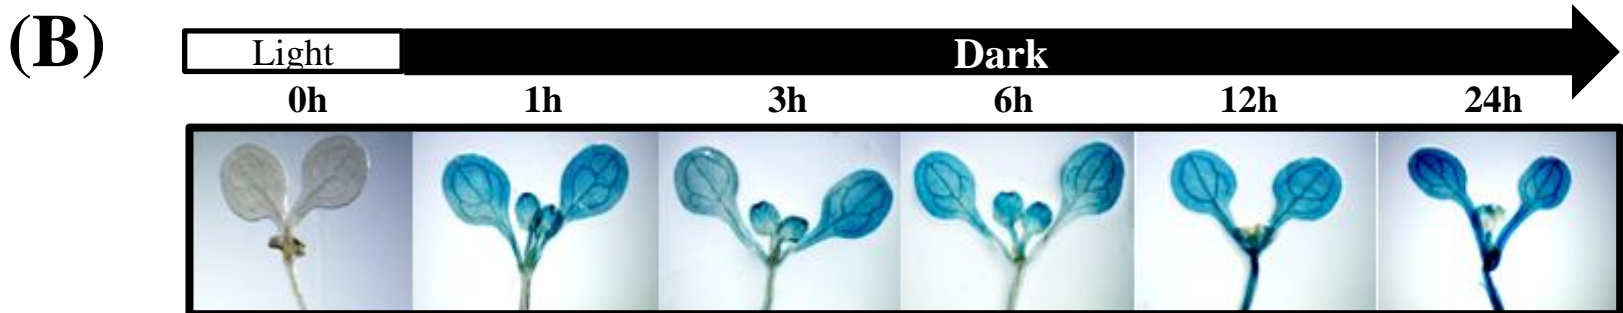

**Figure S4.** Light-dependent activity of the *MYBH* promoter.

(A) Transgenic plants that harbored *MYBHpro::GUS* were grown on Murashige and Skoog (MS) medium for 7 d after stratification in light or continuous darkness for histochemical GUS staining. The *MYBHpro::GUS* seeds were sown on MS medium under light (B) or continuous darkness (C). After 7 d, the light conditions were changed from light to dark (B) or from dark to light (C) for the indicated times. The *MYBHpro::GUS* transgenic seedlings were then collected for histochemical GUS staining at 0, 1, 3, 6, 12, and 24 h after exposure. Three independent experiments were conducted.

# Supplementary figure S4

(C)

*MYBHpro::GUS*

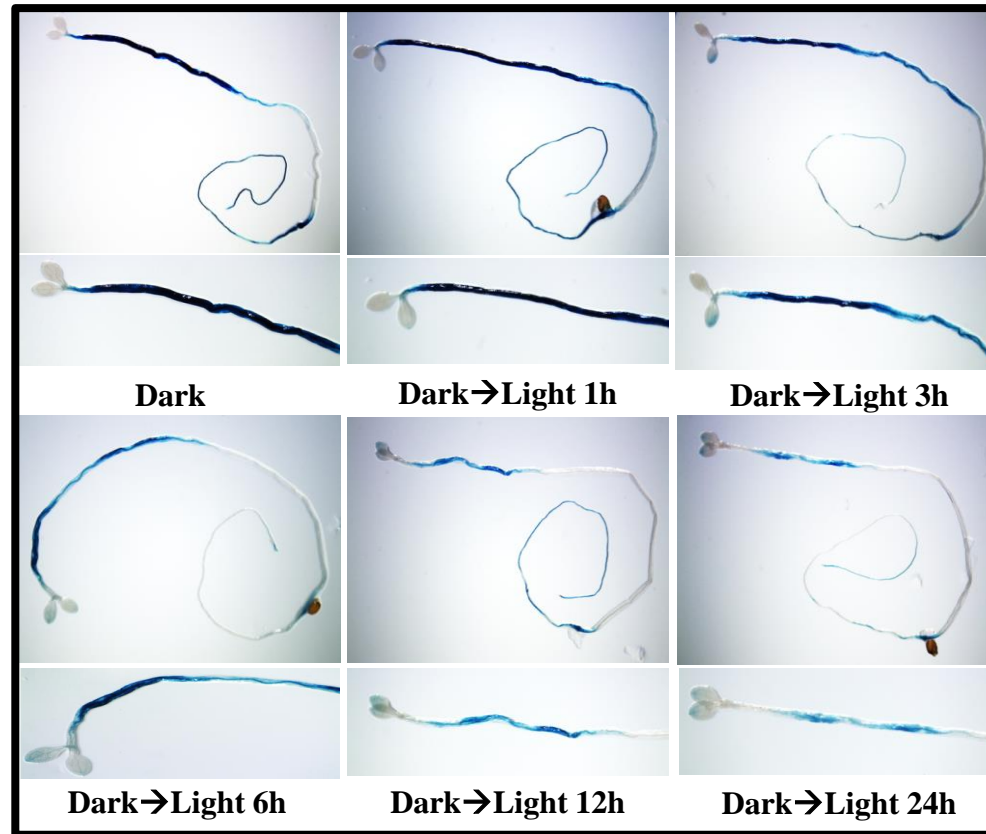

**Figure S4.** Light-dependent activity of the *MYBH* promoter.

(A) Transgenic plants that harbored *MYBHpro::GUS* were grown on Murashige and Skoog (MS) medium for 7 d after stratification in light or continuous darkness for histochemical GUS staining. The *MYBHpro::GUS* seeds were sown on MS medium under light (B) or continuous darkness (C). After 7 d, the light conditions were changed from light to dark (B) or from dark to light (C) for the indicated times. The *MYBHpro::GUS* transgenic seedlings were then collected for histochemical GUS staining at 0, 1, 3, 6, 12, and 24 h after exposure. Three independent experiments were conducted.

# Supplementary figure S5

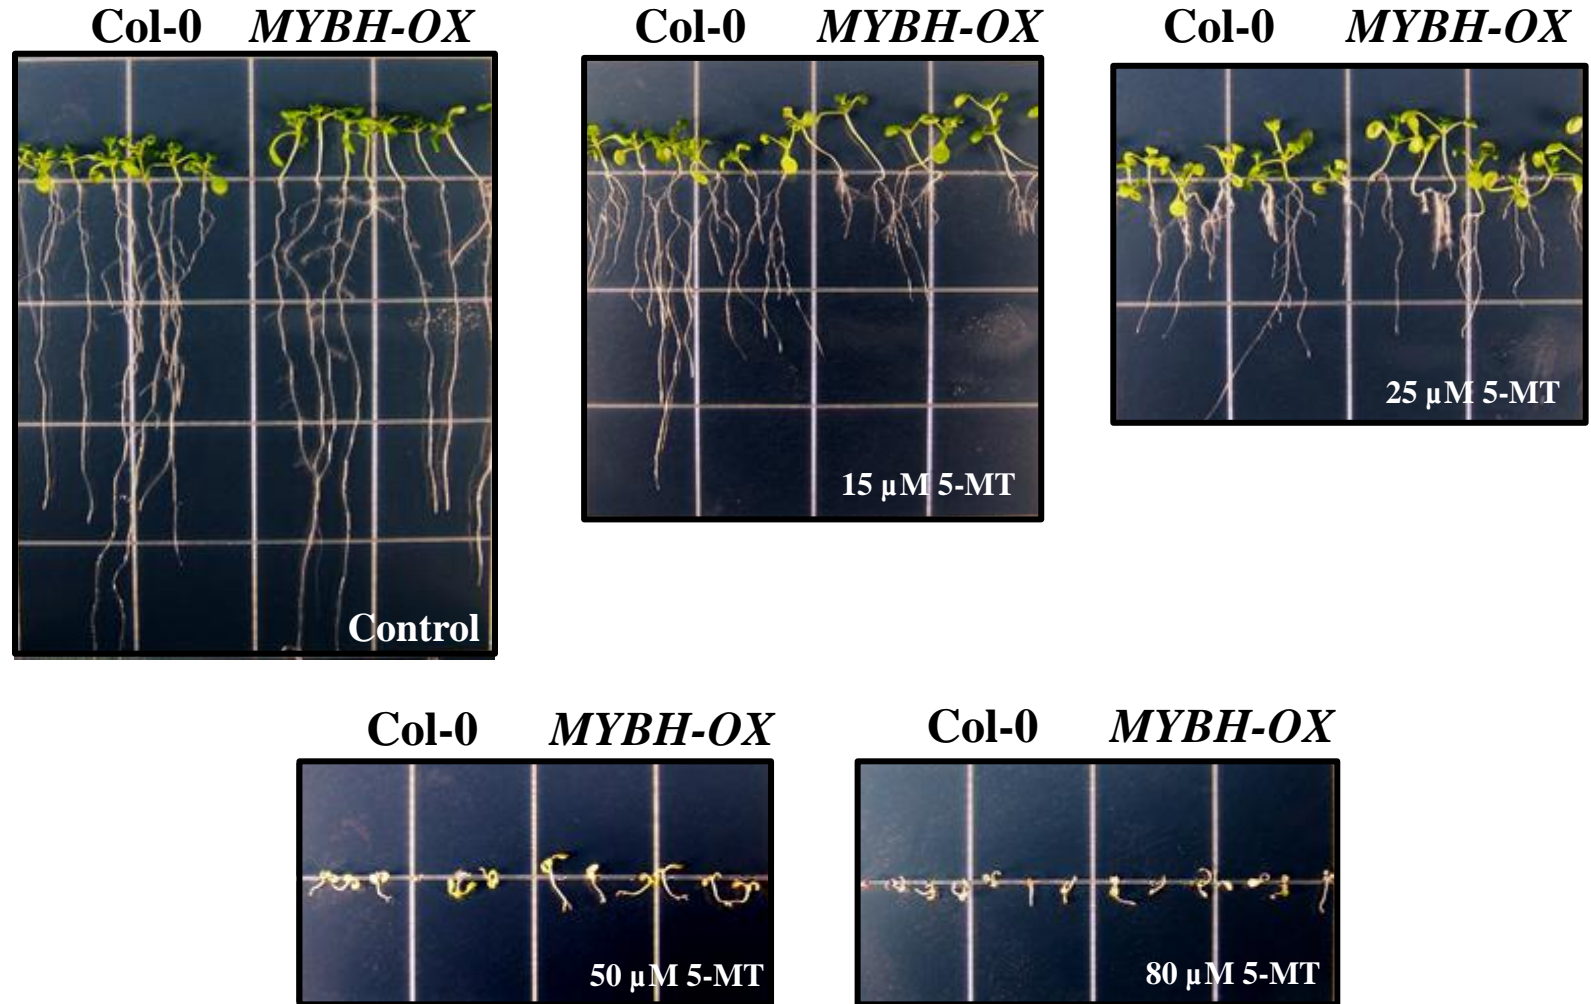

**Figure S5.** Effect of the auxin biosynthesis inhibitor 5-methyltryptophan on *MYBH-OX* seedling growth

Col-0 and *MYBH-OX* seedlings were grown on Murashige and Skoog medium that was supplemented with the indicated concentrations of 5-methyltryptophan (5-MT) for 7 d. Three independent experiments were conducted (n = 90).



# Supplementary figure S6

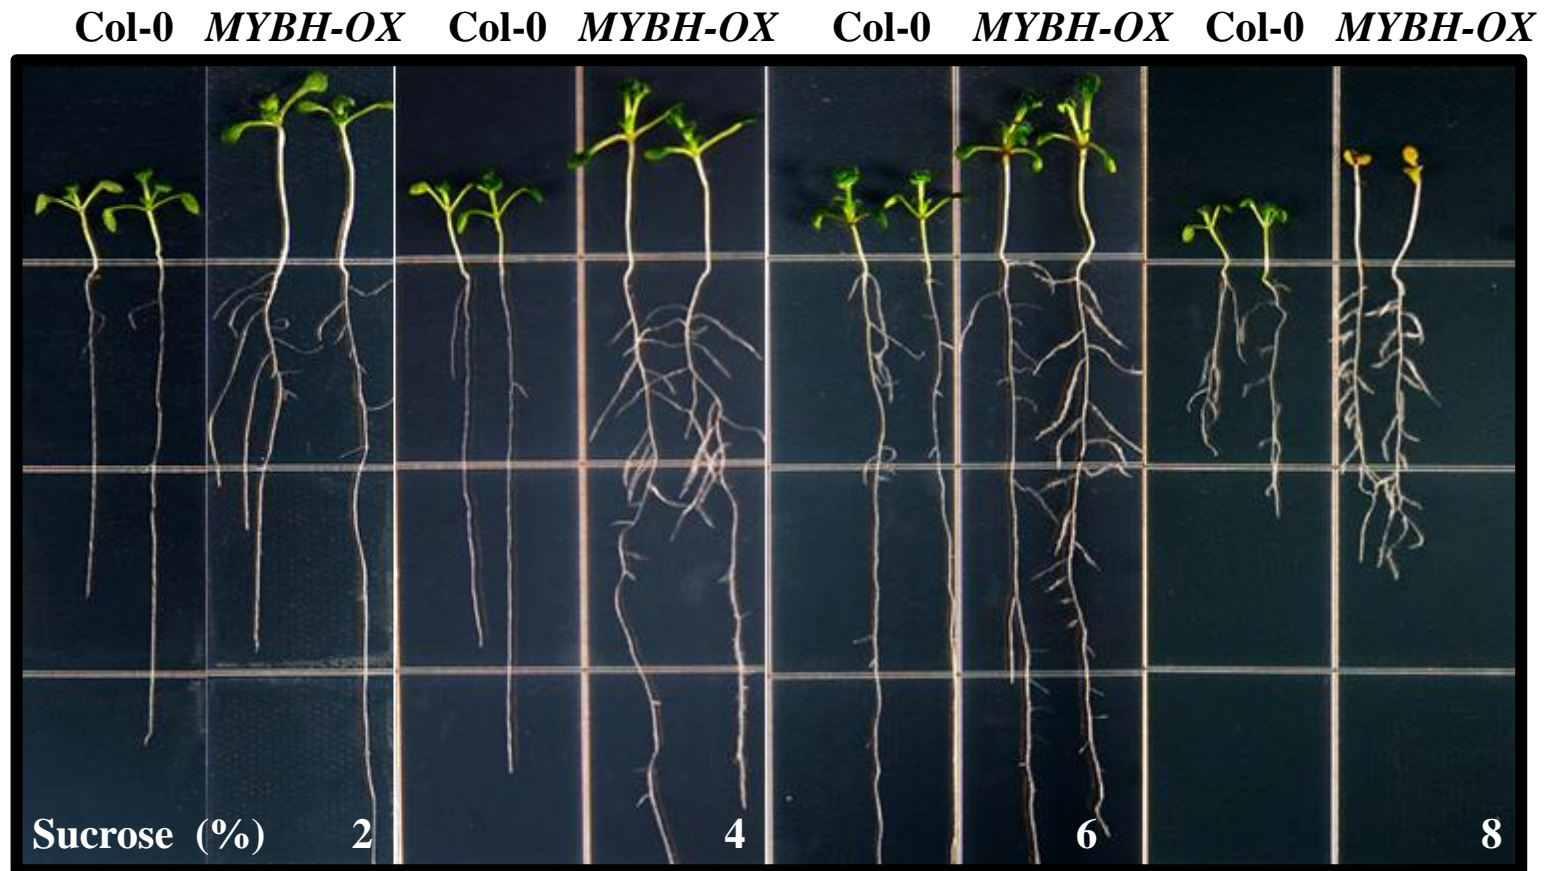

**Figure S6.** Increase in lateral root number of *MYBH-OX* in response to sucrose  
Wild-type (*Col-0*) and *MYBH-OX* seedlings were grown on Murashige and Skoog medium that was supplemented with the indicated concentrations of sucrose for 7 d. Three independent experiments were conducted (n = 90).



# Supplementary figure S7

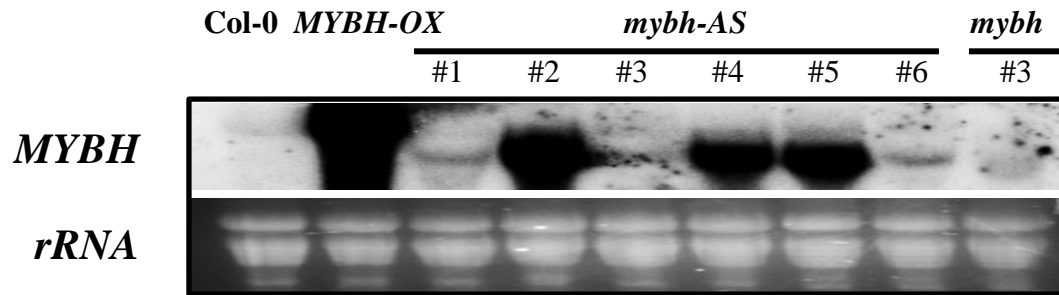

**Figure S7.** *MYBH* transcript levels in Col-0, *MYBH-OX*, *mybh-AS*, and *mybh* plants. Fourteen-day-old Col-0, *MYBH-OX*, *mybh*, and *mybh-AS* seedlings were harvested for RNA extraction and RNA blotting analysis. *MYBH* transcript levels are shown. *rRNA* was used as a loading control.

# Supplementary figure S8

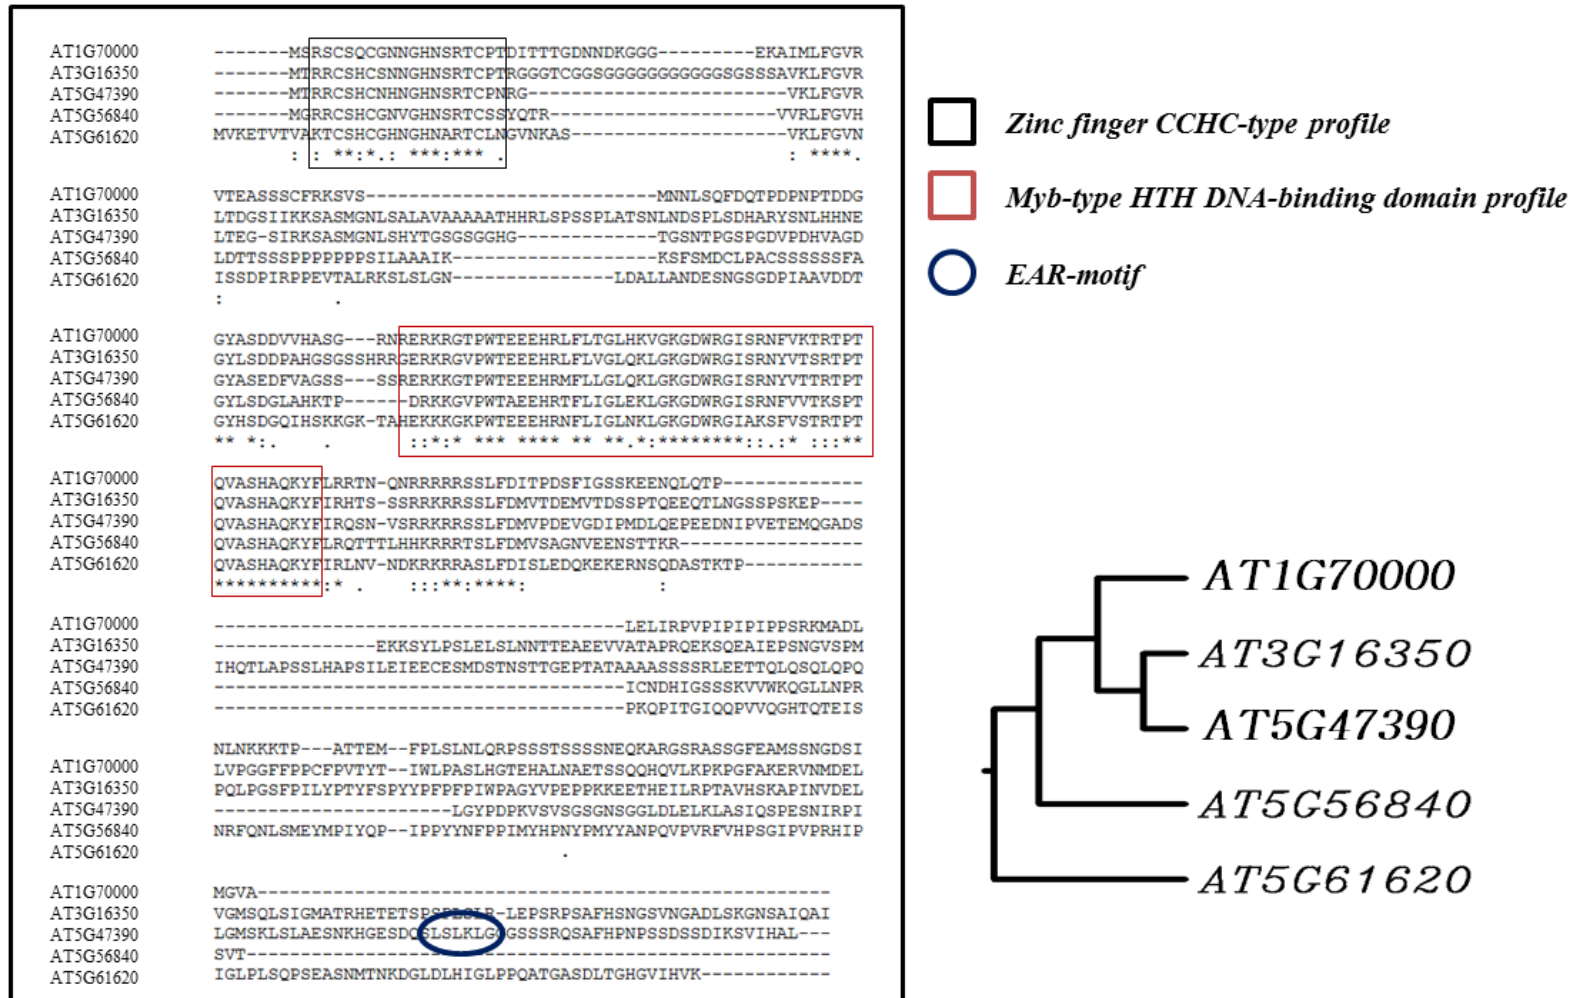

**Figure S8.** *MYBH* homologues in *Arabidopsis thaliana*

The homologues of *MYBH* in *Arabidopsis thaliana* are indicated by the protein sequence alignment.

# Supplementary figure S9

## MYBH working model

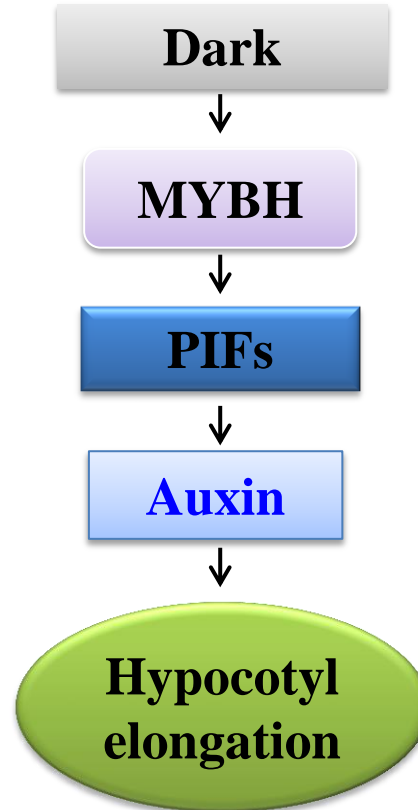

**Figure S9.** Working model of MYBH activity during dark-induced hypocotyl elongation

MYBH is likely to act as a transcriptional regulator during development of the hypocotyl. After induction in the dark, MYBH enhanced the expression of auxin-related genes such as *PIF4* and *PIF5*, and then induced auxin accumulation that could increase hypocotyl elongation.

# Supplementary Table S1

**Table S1. Primer sequences used in this current study**

| Gene           | Forward (5'-3')          | Reverse (5'-3')          |                        |
|----------------|--------------------------|--------------------------|------------------------|
| <i>MYBH</i>    | ATGACTCGTCGATGTTCTCACTGC | TTATAAAGCGTGTATCACGC     | <b>For<br/>cloning</b> |
| <i>MYBHpro</i> | ACAAACACTGGGATCCTCCA     | ACCCGACCCGATTTGCTTCTCTTA |                        |
| <i>PIF4</i>    | ATGGAACACCAAGGTTGG       | CTAGTGGTCCAAACGAGA       | <b>For<br/>qRT-PCR</b> |
| <i>PIF5</i>    | ATGGAACAAGTGTTTGCTG      | CCATATGAAGACTGTCCG       |                        |
| <i>HY5</i>     | ATGCAGGAACAAGCGACTAGCT   | TCAAAGGCTTGCATCAGC       |                        |
| <i>CAB</i>     | GACAAT GAGGAAGACTGTTGCC  | TTCCGGGAACAAAGTTGGTTGCG  |                        |
| <i>EXP3</i>    | GTTGGGCGTATTAGAGTC       | ACAACCAGTTTCAGGAGG       |                        |
| <i>ACTIN7</i>  | ATGGCCGATGGTGAGGATAT     | TCCTGTGAACAATCGATGGACC   |                        |
| <i>YUCCA8</i>  | ATCAACCCTAAGTTCAACGAGTG  | CTCCCGTAGCCACCACAAG      |                        |
